# Supplementary material for: Magnetic Resonance with Diffusion and Dynamic Perfusion-Weighted Imaging in the Assessment of Early Chemoradiotherapy Response of Naso-Oropharyngeal Carcinoma
Source: MDPI journal article supplement (doi:10.3390/app13052799), 2023-02-22
Supplement: s1 [file s1]

# Supplementary Material: Magnetic Resonance with Diffusion and Dynamic Perfusion-Weighted Imaging in the Assessment of Early Chemoradiotherapy Response of Naso-Oropharyngeal Carcinoma

Michele Pietragalla <sup>1</sup>, Eleonora Bicci <sup>1</sup>, Linda Calistri <sup>1</sup>, Chiara Lorini <sup>2</sup>, Pierluigi Bonomo <sup>3</sup>, Andrea Borghesi <sup>4</sup>, Antonio Lo Casto <sup>5</sup>, Francesco Mungai <sup>6</sup>, Luigi Bonasera <sup>6</sup>, Giandomenico Maggiore <sup>7</sup> and Cosimo Nardi <sup>1,\*</sup>

<sup>1</sup> Radiodiagnostic Unit N. 2, Department of Experimental and Clinical Biomedical Sciences, University of Florence—Azienda Ospedaliero-Universitaria Careggi, 50134 Florence, Italy;

michele.pietragalla@unifi.it (M.P.); eleonora.bicci92@gmail.com (E.B.); linda.calistri@unifi.it (L.C.)

<sup>2</sup> Department of Health Science, University of Florence, 50134 Florence, Italy; chiara.lorini@unifi.it

<sup>3</sup> Radiation Oncology, University of Florence—Azienda Ospedaliero-Universitaria Careggi, 50134 Florence, Italy; bonomopierlu@gmail.com

<sup>4</sup> Department of Medical and Surgical Specialties, Radiological Sciences, and Public Health, University of Brescia, 25123 Brescia, Italy; andrea.borghesi@unibs.it

<sup>5</sup> Department of Biomedicine, Neuroscience and Advanced Diagnostics (BIND), University Hospital of Palermo, 90127 Palermo, Italy; antonio.locasto@unipa.it

<sup>6</sup> Department of Radiology, University of Florence—Azienda Ospedaliero-Universitaria Careggi, 50134 Florence, Italy; f.mungai@gmail.com (F.M.); luigi.bonasera72@gmail.com (L.B.)

<sup>7</sup> Department of Otorhinolaryngology, University of Florence—Azienda Ospedaliero-Universitaria Careggi, Via Taddeo Alderotti, 50139 Florence, Italy; maggiore2@virgilio.it

\* Correspondence: cosimo.nardi@unifi.it

## Material and Methods

**Table S1.** Patients' data retrieved in the study. M: male; F: female; O: oropharynx; N: nasopharynx; P: positive; N: negative; U: unknown; RT: post-chemoradiotherapy changes; PR: tumour persistence/recurrence. \*The eighth edition of the American Joint Commission on Cancer TNM staging

| Patient | Gender | Age in years | Tumour site | HPV status | TNM*     | Tumour stage | Follow-up |
|---------|--------|--------------|-------------|------------|----------|--------------|-----------|
| 1       | F      | 63           | O           | P          | T2N1M0   | I            | RT        |
| 2       | M      | 48           | N           | U          | T4N2M0   | IVA          | RT        |
| 3       | F      | 72           | O           | U          | T3N0M0   | III          | RT        |
| 4       | M      | 72           | O           | P          | T2N1M0   | I            | RT        |
| 5       | M      | 61           | O           | U          | T4aN2bM0 | IVA          | RT        |
| 6       | F      | 36           | N           | U          | T2aN1M0  | IIB          | RT        |
| 7       | F      | 52           | N           | N          | T1N0M0   | I            | PR        |
| 8       | M      | 81           | O           | P          | T1N1M0   | I            | RT        |
| 9       | M      | 57           | N           | N          | T1N2M0   | III          | RT        |
| 10      | F      | 58           | O           | U          | T4aN1M0  | IVA          | RT        |
| 11      | M      | 59           | N           | U          | T2bN2M0  | III          | RT        |
| 12      | M      | 68           | O           | P          | T1N1M0   | I            | RT        |
| 13      | M      | 58           | O           | P          | T1N1M0   | I            | RT        |
| 14      | F      | 63           | O           | P          | T2N1M0   | I            | RT        |
| 15      | M      | 75           | O           | P          | T1N1M0   | I            | RT        |
| 16      | F      | 57           | O           | P          | T1N1M0   | I            | RT        |

|    |   |    |   |   |         |     |    |
|----|---|----|---|---|---------|-----|----|
| 17 | M | 37 | N | U | T2aN3M0 | IVB | RT |
| 18 | F | 51 | O | P | T2N1M0  | I   | RT |
| 19 | M | 61 | O | U | T4aN1M0 | IVA | RT |
| 20 | M | 57 | O | P | T2N1M0  | I   | RT |
| 21 | F | 52 | N | U | T1N1M0  | IIB | RT |
| 22 | M | 67 | O | N | T4aN0M0 | IVA | RT |
| 23 | F | 65 | O | U | T3N1M0  | III | RT |
| 24 | M | 58 | N | U | T3N3M1  | IVC | PR |
| 25 | F | 63 | N | N | T4N2M0  | IVA | RT |
| 26 | F | 55 | O | U | T4aN1M0 | IVA | PR |
| 27 | F | 47 | O | P | T4N1M0  | II  | RT |
| 28 | M | 61 | O | P | T1N2M0  | II  | RT |
| 29 | F | 47 | O | N | T4aN2M0 | IVA | PR |
| 30 | F | 69 | O | P | T2N1M0  | I   | RT |
| 31 | M | 41 | O | P | T1N1M0  | I   | RT |
| 32 | M | 52 | N | U | T2N0M0  | IIA | RT |
| 33 | F | 55 | O | P | T1N1M0  | I   | RT |
| 34 | M | 63 | O | N | T3N1M0  | III | PR |
| 35 | F | 58 | N | U | T2N2M0  | III | RT |
| 36 | F | 39 | O | P | T2N1M0  | I   | RT |
| 37 | M | 56 | O | P | T2N1M0  | I   | RT |

**Table S2.** Magnetic resonance acquisition protocol performed for the study of naso-oropharyngeal carcinoma staging and 4-month follow-up from ending chemoradiotherapy. Unenhanced scans included sagittal fat saturated T1- and T2-weighted sampling perfection with application-optimized contrasts using different flip angle evolution (SPACE) sequences with axial, coronal, and sagittal multiplanar reconstructions; axial T2-weighted turbo spin echo; axial fat saturated echo-planar DWI spectral attenuated inversion recovery (SPAIR) with two b-values (b50-800 s/mm<sup>2</sup>) and ADC maps; two axial T1-weighted volumetric interpolated breath-hold examination (VIBE) DCE-PWI with application of flip angle (FA) 5° and 15°, respectively. Enhanced scans performed after intravenous gadolinium chelates contrast agent injection (gadobutrol, 1 mL/10 kg, flow 3 mL/sec followed by 20 mL saline flush) consisted of an axial VIBE DCE-PWI with application of FA 30° and peripheral K space sampling with time to centre 2.2 s, an axial T1-weighted turbo spin echo, and an axial VIBE Dixon.

| Sequence                                                    | Contrast agent | Repetition time (ms) | Echo time (ms) | Slice thickness (mm) | Interslice gap (mm) | Field of view (mm) | Matrix   | Acceleration factor | Number of signal averaged | Band width (Hz/Px) | Acquisition time (min:sec) | Voxel size            |
|-------------------------------------------------------------|----------------|----------------------|----------------|----------------------|---------------------|--------------------|----------|---------------------|---------------------------|--------------------|----------------------------|-----------------------|
| SPACE T1-w<br>Sagittal                                      | pre            | 500                  | 7.2            | 0.9                  | -                   | 229<br>x           | 230<br>x | 2                   | 1.4                       | 630                | 5:47                       | 0.9 x<br>0.9 x<br>0.9 |
| SPACE T2-w<br>Sagittal<br>Fat-Sat                           | pre            | 3000                 | 380            | 0.9                  | -                   | 229<br>x           | 230<br>x | 2                   | 1.4                       | 698                | 5:56                       | 0.9 x<br>0.9 x<br>0.9 |
| TSE T2-w<br>Axial                                           | pre            | 5050                 | 117            | 3                    | 0.9                 | 210<br>x           | 261<br>x | 2                   | 3                         | 191                | 2:23                       | 0.5 x<br>0.5 x<br>3.0 |
| SPAIR EPI-<br>DWI Axial<br>(b 50/800<br>s/mm <sup>2</sup> ) | pre            | 4100                 | 55             | 3                    | 0.9                 | 240<br>x           | 102<br>x | 3                   | 1                         | 1608               | 3:09                       | 1.6 x<br>1.6 x<br>3.0 |
| VIBE T1-w<br>DCE-PWI<br>Axial; FA 5°, 15°                   | pre            | 4.65                 | 1.66           | 3.5                  | 0.7                 | 250<br>x           | 139<br>x | 3                   | 1                         | 390                | 1:04                       | 1.3 x<br>1.3 x<br>3.5 |
| TSE T1-w<br>Axial                                           | post           | 440                  | 17             | 3                    | 0.9                 | 200<br>x           | 384<br>x | 3                   | 3                         | 200                | 2:31                       | 0.5 x<br>0.5 x<br>3.0 |
| VIBE Dixon<br>Axial                                         | post           | 10                   | 2.4            | 0.9                  | 0.18                | 225<br>x           | 212<br>x | -                   | 1                         | 340                | 4:37                       | 0.9 x<br>0.9 x<br>0.9 |
| VIBE T1-w<br>DCE-PWI<br>Axial; FA 30°                       | post           | 4.65                 | 1.66           | 3.5                  | 0.7                 | 250<br>x           | 139<br>x | 3                   | 1                         | 300                | 4:17                       | 1.3 x<br>1.3 x<br>3.5 |

## Results

**Table S3.** Pre-treatment patients' data.

ADC: apparent diffusion coefficient; AUC: area under the curve; k(trans): the volume transfer constant from the vascular space to the extravascular extracellular space; pre: values measured on magnetic resonance imaging performed for tumour staging.

| Patient | Tumour maximum size (mm) | Tumour mean ADC ( $\times 10^{-3}$ mm <sup>2</sup> /s) [ADCpre] | Ipsilateral trapezius muscle mean ADC ( $\times 10^{-3}$ mm <sup>2</sup> /s) [ADCmuscle pre] | ADCpre/muscle pre | Tumour mean AUC [AUCpre] | Ipsilateral trapezius muscle mean AUC [AUCmuscle pre] | AUC pre/muscle pre | Tumour mean K(trans) value ( $\times 10^{-3}$ min) [K(trans)pre] | Ipsilateral trapezius muscle mean K(trans) [K(trans)muscle pre] | K(trans) pre/muscle pre |
|---------|--------------------------|-----------------------------------------------------------------|----------------------------------------------------------------------------------------------|-------------------|--------------------------|-------------------------------------------------------|--------------------|------------------------------------------------------------------|-----------------------------------------------------------------|-------------------------|
| 1       | 15                       | 0.98                                                            | 1.23                                                                                         | 0.79              | 157.64                   | 35.65                                                 | 4.42               | 357.83                                                           | 46.41                                                           | 7.71                    |
| 2       | 17                       | 0.74                                                            | 1.23                                                                                         | 0.60              | 58.74                    | 8.97                                                  | 6.55               | 78.22                                                            | 20.20                                                           | 3.87                    |
| 3       | 40                       | 1.13                                                            | 1.14                                                                                         | 0.99              | 99.44                    | 21.50                                                 | 4.63               | 786.30                                                           | 93.28                                                           | 8.42                    |
| 4       | 13                       | 0.74                                                            | 1.43                                                                                         | 0.51              | 146.75                   | 27.02                                                 | 5.43               | 347.44                                                           | 48.55                                                           | 7.71                    |
| 5       | 32                       | 0.67                                                            | 1.24                                                                                         | 0.54              | 57.39                    | 18.31                                                 | 3.13               | 726.74                                                           | 122.06                                                          | 5.95                    |
| 6       | 15                       | 0.73                                                            | 1.45                                                                                         | 0.50              | 80.81                    | 52.73                                                 | 1.53               | 105.12                                                           | 68.92                                                           | 1.52                    |
| 7       | 30                       | 0.92                                                            | 1.26                                                                                         | 0.73              | 55.66                    | 17.63                                                 | 3.16               | 167.50                                                           | 39.13                                                           | 4.28                    |
| 8       | 15                       | 1.14                                                            | 1.23                                                                                         | 0.92              | 83.51                    | 36.02                                                 | 2.31               | 493.01                                                           | 38.97                                                           | 12.92                   |
| 9       | 15                       | 0.56                                                            | 1.16                                                                                         | 0.48              | 76.38                    | 27.16                                                 | 2.81               | 231.07                                                           | 37.05                                                           | 5.75                    |
| 10      | 20                       | 1.04                                                            | 1.24                                                                                         | 0.83              | 190.12                   | 38.54                                                 | 4.93               | 493.36                                                           | 115.59                                                          | 4.26                    |
| 11      | 14                       | 0.76                                                            | 1.13                                                                                         | 0.67              | 70.31                    | 40.85                                                 | 1.72               | 354.09                                                           | 174.07                                                          | 2.03                    |
| 12      | 10                       | 0.93                                                            | 1.15                                                                                         | 0.80              | 44.71                    | 9.07                                                  | 4.93               | 79.71                                                            | 14.54                                                           | 5.48                    |
| 13      | 18                       | 0.74                                                            | 1.22                                                                                         | 0.60              | 79.62                    | 18.10                                                 | 4.39               | 275.87                                                           | 44.61                                                           | 6.18                    |
| 14      | 15                       | 0.72                                                            | 1.13                                                                                         | 0.63              | 78.04                    | 25.02                                                 | 3.11               | 92.84                                                            | 15.65                                                           | 5.93                    |
| 15      | 24                       | 0.64                                                            | 1.11                                                                                         | 0.57              | 56.36                    | 15.82                                                 | 3.56               | 375.88                                                           | 93.92                                                           | 4.0                     |
| 16      | 14                       | 0.76                                                            | 1.24                                                                                         | 0.61              | 70.33                    | 35.12                                                 | 2.01               | 79.79                                                            | 40.63                                                           | 1.96                    |
| 17      | 12                       | 0.72                                                            | 1.24                                                                                         | 0.58              | 49.57                    | 19.47                                                 | 2.54               | 141.65                                                           | 34.56                                                           | 4.09                    |
| 18      | 17                       | 0.86                                                            | 1.12                                                                                         | 0.76              | 103.94                   | 24.68                                                 | 4.21               | 135.98                                                           | 23.63                                                           | 5.75                    |
| 19      | 20                       | 0.97                                                            | 1.22                                                                                         | 0.79              | 100.99                   | 15.99                                                 | 6.73               | 159.62                                                           | 13.76                                                           | 11.60                   |
| 20      | 11                       | 0.83                                                            | 1.34                                                                                         | 0.61              | 213.73                   | 47.41                                                 | 4.50               | 331.72                                                           | 41.46                                                           | 8.04                    |
| 21      | 13                       | 0.65                                                            | 1.23                                                                                         | 0.52              | 116.34                   | 50.28                                                 | 2.31               | 134.07                                                           | 44.23                                                           | 3.02                    |
| 22      | 20                       | 0.99                                                            | 1.13                                                                                         | 0.87              | 70.71                    | 12.79                                                 | 5.52               | 391.55                                                           | 37.20                                                           | 10.52                   |
| 23      | 17                       | 0.96                                                            | 0.95                                                                                         | 1.01              | 147.01                   | 29.03                                                 | 5.06               | 269.13                                                           | 45.89                                                           | 5.91                    |
| 24      | 7                        | 1.0                                                             | 1.22                                                                                         | 0.81              | 159.7                    | 45.90                                                 | 3.46               | 231.28                                                           | 49.19                                                           | 4.70                    |
| 25      | 21                       | 0.78                                                            | 1.17                                                                                         | 0.66              | 128.12                   | 68.04                                                 | 1.88               | 173.49                                                           | 74.38                                                           | 2.33                    |
| 26      | 22                       | 0.80                                                            | 1.23                                                                                         | 0.65              | 90.94                    | 24.12                                                 | 3.77               | 113.35                                                           | 21.67                                                           | 5.23                    |
| 27      | 35                       | 0.79                                                            | 1.26                                                                                         | 0.62              | 51.80                    | 21.54                                                 | 2.42               | 61.39                                                            | 12.76                                                           | 4.81                    |
| 28      | 17                       | 0.87                                                            | 1.09                                                                                         | 0.79              | 113.87                   | 35.40                                                 | 3.21               | 128.46                                                           | 32.45                                                           | 3.95                    |
| 29      | 23                       | 0.83                                                            | 1.16                                                                                         | 0.71              | 100.14                   | 16.98                                                 | 5.89               | 117.63                                                           | 24.86                                                           | 4.73                    |

|    |    |      |      |      |        |       |      |        |        |       |
|----|----|------|------|------|--------|-------|------|--------|--------|-------|
| 30 | 20 | 0.74 | 1.18 | 0.62 | 69.72  | 28.58 | 2.43 | 80.56  | 32.24  | 2.49  |
| 31 | 14 | 1.03 | 1.15 | 0.89 | 82.51  | 35.02 | 2.35 | 488.01 | 39.97  | 12.20 |
| 32 | 12 | 0.75 | 1.20 | 0.62 | 78.38  | 29.16 | 2.68 | 230.07 | 36.05  | 6.38  |
| 33 | 8  | 0.94 | 1.11 | 0.84 | 188.22 | 36.54 | 5.15 | 470.36 | 113.59 | 4.14  |
| 34 | 23 | 0.81 | 1.18 | 0.68 | 100.38 | 17.18 | 5.84 | 118.70 | 25.68  | 4.62  |
| 35 | 32 | 0.68 | 1.20 | 0.56 | 71.41  | 41.35 | 1.72 | 355.19 | 174.57 | 2.03  |
| 36 | 15 | 0.90 | 1.23 | 0.73 | 42.71  | 8.95  | 4.77 | 78.81  | 14.77  | 5.33  |
| 37 | 17 | 0.75 | 1.11 | 0.67 | 79.69  | 18.20 | 4.37 | 273.82 | 44.31  | 6.17  |

**Table S4.** Post-treatment patients' data.

T2 signal intensity is referred with respect to the muscle. Hypo: lower than muscle. Hyper+: similar or slightly higher than muscle. Higher ++: clearly higher than muscle; ADC: apparent diffusion coefficient; AUC: area under the curve; K(trans): the volume transfer constant from the vascular space to the extravascular extracellular space; post: values measured on magnetic resonance imaging performed for 4-month follow-up.

| Patient | Submucosal enhanced thickness (mm) | T2 signal intensity | DWI b800 signal intensity | Residual tissue mean ADC ( $\times 10^{-3} \text{ mm}^2/\text{s}$ ) [ADCpost] | Ipsilateral trapezius muscle mean ADC ( $\times 10^{-3} \text{ mm}^2/\text{s}$ ) [ADCmuscle post] | ADCpost/muscle post | Residual tissue mean AUC [AUCpost] | Ipsilateral trapezius muscle AUC [AUCmuscle post] | AUCpost/muscle post | Residual tissue mean K(trans) ( $\times 10^{-3} \text{ min}$ ) [K(trans)post] | Ipsilateral trapezius muscle mean K(trans) [K(trans) muscle post] | K(trans) post/muscle post |
|---------|------------------------------------|---------------------|---------------------------|-------------------------------------------------------------------------------|---------------------------------------------------------------------------------------------------|---------------------|------------------------------------|---------------------------------------------------|---------------------|-------------------------------------------------------------------------------|-------------------------------------------------------------------|---------------------------|
| 1       | 0                                  | Hyper ++            | Hypo                      | 1.75                                                                          | 1.23                                                                                              | 1.42                | 89.67                              | 26.87                                             | 3.33                | 176.87                                                                        | 33.21                                                             | 5.32                      |
| 2       | 3                                  | Hyper +             | Hypo                      | 1.76                                                                          | 1.32                                                                                              | 1.33                | 35.37                              | 10                                                | 3.54                | 72.4                                                                          | 21.75                                                             | 3.32                      |
| 3       | 10                                 | Hyper +             | Hypo                      | 1.60                                                                          | 1.14                                                                                              | 1.40                | 216.24                             | 44.49                                             | 4.86                | 97.82                                                                         | 20.16                                                             | 4.85                      |
| 4       | 0                                  | Hypo                | Hypo                      | 1.47                                                                          | 1.25                                                                                              | 1.76                | 61.72                              | 30.2                                              | 2.04                | 31.33                                                                         | 11.33                                                             | 2.76                      |
| 5       | 10                                 | Hypo                | Hypo                      | 1.33                                                                          | 1.12                                                                                              | 1.18                | 83.73                              | 29.83                                             | 2.8                 | 223.99                                                                        | 115.13                                                            | 1.94                      |
| 6       | 5                                  | Hyper ++            | Hyper                     | 1.53                                                                          | 1.32                                                                                              | 1.16                | 88.04                              | 21.38                                             | 4.11                | 595.25                                                                        | 123.07                                                            | 4.83                      |
| 7       | 27                                 | Hyper +             | Hyper                     | 1.24                                                                          | 1.62                                                                                              | 0.77                | 59.77                              | 17                                                | 3.52                | 128.1                                                                         | 28.1                                                              | 4.55                      |
| 8       | 0                                  | Hypo                | Hypo                      | 1.44                                                                          | 1.12                                                                                              | 1.29                | 188.77                             | 57.9                                              | 3.26                | 422                                                                           | 28.56                                                             | 14.77                     |
| 9       | 6                                  | Hyper ++            | Hypo                      | 1.75                                                                          | 1.13                                                                                              | 1.55                | 117.93                             | 19.41                                             | 6.07                | 590.69                                                                        | 25.6                                                              | 23.07                     |
| 10      | 10                                 | Hyper ++            | Hyper                     | 1.35                                                                          | 1.23                                                                                              | 1.10                | 96.93                              | 28.33                                             | 3.42                | 77.54                                                                         | 11.8                                                              | 6.57                      |
| 11      | 6                                  | Hyper +             | Hypo                      | 1.48                                                                          | 1.22                                                                                              | 1.21                | 51.66                              | 23.35                                             | 2.21                | 87.95                                                                         | 50.84                                                             | 1.72                      |
| 12      | 0                                  | Hyper ++            | Hypo                      | 1.34                                                                          | 1.13                                                                                              | 1.85                | 108.56                             | 18.08                                             | 6.01                | 76.41                                                                         | 8.46                                                              | 9.03                      |
| 13      | 9                                  | Hypo                | Hypo                      | 1.66                                                                          | 1.32                                                                                              | 1.26                | 63.53                              | 13.99                                             | 4.54                | 787.92                                                                        | 153.73                                                            | 5.12                      |
| 14      | 0                                  | Hypo                | Hypo                      | 1.44                                                                          | 1.23                                                                                              | 1.17                | 98.93                              | 51.03                                             | 1.93                | 48.36                                                                         | 26.49                                                             | 1.82                      |
| 15      | 10                                 | Hypo                | Hypo                      | 1.65                                                                          | 1.21                                                                                              | 1.36                | 96.45                              | 18.51                                             | 5.21                | 25.54                                                                         | 7.02                                                              | 3.36                      |
| 16      | 0                                  | Hyper ++            | Hypo                      | 1.71                                                                          | 1.32                                                                                              | 1.30                | 152.07                             | 50.91                                             | 2.98                | 202.03                                                                        | 55.45                                                             | 3.64                      |
| 17      | 0                                  | Hyper ++            | Hypo                      | 1.31                                                                          | 1.35                                                                                              | 0.97                | 94.94                              | 29.88                                             | 3.17                | 121.81                                                                        | 27.22                                                             | 4.47                      |
| 18      | 0                                  | Hypo                | Hypo                      | 1.75                                                                          | 1.22                                                                                              | 1.43                | 84.58                              | 28.29                                             | 2.98                | 87.43                                                                         | 26.93                                                             | 3.24                      |
| 19      | 3                                  | Hyper ++            | Hypo                      | 1.61                                                                          | 1.37                                                                                              | 1.75                | 123.78                             | 29.15                                             | 4.24                | 122.78                                                                        | 24.54                                                             | 5.02                      |
| 20      | 4                                  | Hyper ++            | Hypo                      | 1.96                                                                          | 1.35                                                                                              | 1.45                | 123.66                             | 28.29                                             | 4.37                | 107.65                                                                        | 23.14                                                             | 4.65                      |
| 21      | 0                                  | Hyper +             | Hypo                      | 1.32                                                                          | 1.33                                                                                              | 0.99                | 63.5                               | 55.8                                              | 1.13                | 57.69                                                                         | 49.01                                                             | 1.17                      |

|    |    |          |       |      |      |      |        |       |      |        |        |       |
|----|----|----------|-------|------|------|------|--------|-------|------|--------|--------|-------|
| 22 | 0  | Hyper ++ | Hypo  | 1.68 | 1.13 | 1.49 | 68.12  | 19.89 | 3.42 | 65.91  | 14.61  | 4.51  |
| 23 | 0  | Hyper ++ | Hypo  | 1.83 | 1.23 | 1.49 | 124.21 | 40.89 | 3.03 | 139.23 | 41.63  | 3.34  |
| 24 | 12 | Hyper +  | Hyper | 0.87 | 1.05 | 0.83 | 161.98 | 40.89 | 3.96 | 169.92 | 41.57  | 4.08  |
| 25 | 0  | Hyper ++ | Hypo  | 1.11 | 1.12 | 0.99 | 91.76  | 39.95 | 2.29 | 79.22  | 41.77  | 1.89  |
| 26 | 7  | Hyper +  | Hypo  | 1.32 | 1.22 | 1.08 | 162.90 | 36.29 | 4.48 | 215.45 | 39.89  | 5.40  |
| 27 | 10 | Hyper +  | Hypo  | 0.96 | 1.17 | 0.82 | 80.58  | 18.57 | 4.33 | 37.29  | 7.08   | 5.26  |
| 28 | 0  | Hyper ++ | Hypo  | 1.54 | 1.28 | 1.20 | 67.22  | 28.01 | 2.39 | 30.41  | 11.15  | 2.27  |
| 29 | 45 | Hyper +  | Hyper | 0.78 | 1.01 | 0.77 | 109.85 | 20.23 | 5.43 | 56.24  | 10.39  | 5.41  |
| 30 | 0  | Hyper ++ | Hypo  | 1.72 | 1.21 | 1.42 | 260.88 | 54.36 | 4.79 | 361.56 | 59.11  | 6.11  |
| 31 | 0  | Hypo     | Hypo  | 1.45 | 1.13 | 1.28 | 59.97  | 17.12 | 3.50 | 421.19 | 28.04  | 15.02 |
| 32 | 5  | Hyper ++ | Hypo  | 1.76 | 1.14 | 1.54 | 189.77 | 58.9  | 3.22 | 582.68 | 25.41  | 22.93 |
| 33 | 11 | Hyper ++ | Hypo  | 1.34 | 1.22 | 1.09 | 118.01 | 19.96 | 5.91 | 77.94  | 11.90  | 6.54  |
| 34 | 42 | Hyper +  | Hyper | 0.79 | 1.01 | 0.78 | 111.83 | 21.33 | 5.24 | 59.27  | 12.07  | 4.91  |
| 35 | 7  | Hypo     | Hypo  | 1.49 | 1.23 | 1.21 | 51.40  | 23.31 | 2.20 | 87.05  | 50.04  | 1.74  |
| 36 | 0  | Hyper ++ | Hypo  | 1.44 | 1.23 | 1.17 | 109.03 | 18.18 | 5.99 | 78.43  | 9.57   | 8.19  |
| 37 | 8  | Hyper ++ | Hypo  | 1.68 | 1.34 | 1.25 | 63.57  | 14.02 | 4.53 | 780.92 | 150.73 | 5.18  |

**Table S5.** Comparison between post-treatment and pre-treatment patients' data.ADC: apparent diffusion coefficient (expressed in  $\times 10^{-3} \text{ mm}^2/\text{s}$ ).

ADCpost-pre: residual tissue mean ADC value - tumour mean ADC value.

ADCpost-pre%: residual tissue mean ADC value - tumour mean ADC value, expressed in percentage calculated as follows:  $\frac{\text{ADCpost-pre} \times 100}{\text{ADCpre}}$ . Negative percentages indicate that ADCpost values are lower than ADCpre.

AUC: area under the curve.

AUCpost/pre: ratio between the residual tissue AUC and tumour AUC values.

AUCpost/pre/muscle: ratio between residual tissue AUC and tumour AUC values, standardized with respect to AUC values of the ipsilateral trapezius muscle.

K(trans): the volume transfer constant from the vascular space to the extravascular extracellular space.

K(trans)post/pre: ratio between the residual tissue K(trans) value and tumour K(trans) value.

K(trans)post/pre/muscle: ratio between the residual tissue K(trans) and tumour K(trans) values, standardized with respect to K(trans) values of the ipsilateral trapezius muscle.

| Patient | ADC post-pre | ADC post-pre% | AUC post/pre | AUC post/pre/muscle | K(trans) post/pre | K(trans) post/pre/muscle |
|---------|--------------|---------------|--------------|---------------------|-------------------|--------------------------|
| 1       | 0.77         | 77            | 0.57         | 0.75                | 0.49              | 0.69                     |
| 2       | 1.02         | 134           | 0.60         | 0.50                | 0.92              | 0.85                     |
| 3       | 0.47         | 40            | 2.17         | 1.01                | 0.12              | 0.57                     |
| 4       | 0.73         | 100           | 0.42         | 0.37                | 0.09              | 0.35                     |
| 5       | 0.66         | 100           | 1.45         | 0.93                | 0.30              | 0.32                     |
| 6       | 0.80         | 110           | 1.08         | 2.70                | 5.66              | 3.17                     |
| 7       | 0.32         | 35            | 1.07         | 1.10                | 0.76              | 1.06                     |
| 8       | 0.30         | 27            | 2.26         | 1.41                | 0.85              | 1.14                     |
| 9       | 1.19         | 209           | 1.53         | 2.20                | 2.55              | 4.01                     |
| 10      | 0.31         | 31            | 0.51         | 0.72                | 0.15              | 1.53                     |
| 11      | 0.72         | 96            | 0.73         | 1.30                | 0.24              | 0.85                     |
| 12      | 0.41         | 43            | 2.42         | 1.23                | 0.95              | 1.64                     |
| 13      | 0.92         | 124           | 0.79         | 1.03                | 2.85              | 0.82                     |

|    |       |     |      |      |      |      |
|----|-------|-----|------|------|------|------|
| 14 | 0.72  | 100 | 1.27 | 0.61 | 0.52 | 0.30 |
| 15 | 1.01  | 159 | 1.71 | 1.47 | 0.06 | 0.84 |
| 16 | 0.95  | 125 | 2.16 | 1.55 | 2.53 | 1.85 |
| 17 | 0.59  | 82  | 1.91 | 1.24 | 0.85 | 1.09 |
| 18 | 0.89  | 103 | 0.81 | 0.75 | 0.56 | 0.56 |
| 19 | 0.64  | 66  | 1.22 | 0.63 | 0.76 | 0.43 |
| 20 | 1.13  | 136 | 0.57 | 1.09 | 0.32 | 0.58 |
| 21 | 0.67  | 103 | 0.54 | 0.52 | 0.43 | 0.38 |
| 22 | 0.69  | 70  | 0.96 | 0.61 | 0.16 | 0.42 |
| 23 | 0.87  | 90  | 0.84 | 0.60 | 0.51 | 0.56 |
| 24 | -0.13 | -13 | 1.01 | 1.14 | 0.73 | 0.86 |
| 25 | 0.33  | 42  | 0.71 | 1.21 | 0.45 | 0.81 |
| 26 | 0.52  | 65  | 1.79 | 1.18 | 1.90 | 1.03 |
| 27 | 0.16  | 21  | 1.55 | 1.79 | 0.60 | 1.09 |
| 28 | 0.67  | 76  | 0.59 | 0.74 | 0.23 | 0.57 |
| 29 | -0.04 | -5  | 1.09 | 0.92 | 0.47 | 1.14 |
| 30 | 0.98  | 131 | 3.74 | 1.97 | 4.48 | 2.44 |
| 31 | 0.43  | 41  | 0.73 | 1.49 | 0.86 | 2.44 |
| 32 | 1.01  | 134 | 2.42 | 1.20 | 2.53 | 3.59 |
| 33 | 0.40  | 42  | 0.63 | 1.15 | 0.16 | 1.57 |
| 34 | -0.01 | -1  | 1.11 | 0.90 | 0.49 | 1.06 |
| 35 | 0.81  | 118 | 0.72 | 1.28 | 0.24 | 0.85 |
| 36 | 0.54  | 60  | 2.55 | 1.25 | 0.99 | 1.53 |
| 37 | 0.93  | 123 | 0.80 | 1.04 | 2.85 | 0.83 |
